# Supplementary material
Source: PubMed Central journal article supplement (PMC4060805)
Supplement: NIHMS579792-supplement-Supplementary_information.pdf [file NIHMS579792-supplement-Supplementary_information.pdf]

## Supporting Information

# A Facile Synthetic Route for Surface Functionalized Magnetic Nanoparticles: Cell Labeling and Magnetic Resonance Imaging Studies

*Hyun Jung Chung*<sup>1,#</sup>, *Haeshin Lee*<sup>2,3,#</sup>, *Ki Hyun Bae*<sup>1</sup>, *Yuhan Lee*<sup>1</sup>, *Jongnam Park*<sup>4</sup>,

*Seung-Woo Cho*<sup>5</sup>, *Jin Young Hwang*<sup>6</sup>, *Hyunwook Park*<sup>6</sup>, *Robert Langer*<sup>7,8,9</sup>, *Daniel*

*Anderson*<sup>7,8,9,\*</sup>, *Tae Gwan Park*<sup>1,3,\*</sup>

<sup>1</sup>Department of Biological Sciences, <sup>2</sup>Department of Chemistry, <sup>3</sup>The Graduate School of Nanoscience & Technology, Korea Advanced Institute of Science and Technology (KAIST), Daejeon, 305-701, Republic of Korea, <sup>4</sup>Energy Engineering, Ulsan National Institute of Science and Technology, Ulsan, Korea 689-805, <sup>5</sup>Department of Biotechnology, Yonsei University, Seoul, 120-749, Republic of Korea, <sup>6</sup>Department of Electrical Engineering, KAIST, Daejeon, 305-701, Republic of Korea, <sup>7</sup>David H. Koch Institute for Integrative Cancer Research, Massachusetts Institute of Technology, Cambridge, MA, 02139, <sup>8</sup>Department of Chemical Engineering, Massachusetts Institute of Technology, Cambridge, MA, 02139, <sup>9</sup>Harvard-Massachusetts Institute of Technology Division of Health Sciences and Technology, Cambridge, MA, 02139 USA

**Table S1.** Screening of a commercial library of PEG derivatives for organic-to-aqueous phase transfer of iron oxide nanoparticles (- : no transfer, + : incomplete

| Category                    | Polymer type                         | Molecular weight | Transfer | Stability after | transfer, ++ : complete transfer). |
|-----------------------------|--------------------------------------|------------------|----------|-----------------|------------------------------------|
| Nonfunctional PEGs          | HO-PEG-OH                            | 1,000            | -        | -               |                                    |
|                             | HO-PEG-OH                            | 2,000            | -        | -               |                                    |
|                             | HO-PEG-OH                            | 3,400            | -        | -               |                                    |
|                             | HO-PEG-OH                            | 5,000            | -        | -               |                                    |
|                             | HO-PEG-OH                            | 10,000           | -        | -               |                                    |
|                             | HO-PEG-OH                            | 20,000           | +        | -               |                                    |
|                             | HO-PEG-OH                            | 35,000           | +        | -               |                                    |
|                             | HO-PEG-OH                            | 2,000,000        | +        | -               |                                    |
| Amine-functionalized PEG    | H <sub>2</sub> N-PEG-NH <sub>2</sub> | 1,000            | -        | -               |                                    |
|                             | H <sub>2</sub> N-PEG-NH <sub>2</sub> | 2,000            | ++       | -               |                                    |
|                             | H <sub>2</sub> N-PEG-NH <sub>2</sub> | 3,400            | ++       | -               |                                    |
|                             | H <sub>2</sub> N-PEG-NH <sub>2</sub> | 5,000            | ++       | +               |                                    |
|                             | H <sub>2</sub> N-PEG-NH <sub>2</sub> | 10,000           | ++       | ++              |                                    |
|                             | H <sub>2</sub> N-PEG-NH <sub>2</sub> | 35,000           | ++       | ++              |                                    |
|                             | 4(PEG-NH <sub>2</sub> ) <sup>a</sup> | 10,000           | ++       | ++              |                                    |
|                             | 6(PEG-NH <sub>2</sub> ) <sup>b</sup> | 15,000           | ++       | ++              |                                    |
| Thiol-functionalized PEG    | HS-PEG-SH                            | 5,000            | -        | -               |                                    |
|                             | 4(PEG-SH) <sup>c</sup>               | 10,000           | +        | -               |                                    |
| Carboxyl-functionalized PEG | HOOC-PEG-COOH                        | 5,000            | ++       | -               |                                    |
|                             | 4(PEG-COOH) <sup>d</sup>             | 10,000           | ++       | -               |                                    |
| Methoxy PEG                 | mPEG <sup>e</sup> -NH <sub>2</sub>   | 2,000            | -        | -               |                                    |
|                             | mPEG-NH <sub>2</sub>                 | 5,000            | ++       | +               |                                    |
|                             | mPEG-COOH                            | 5,000            | ++       | -               |                                    |
|                             | mPEG-SH                              | 5,000            | -        | -               |                                    |
| Hetero-functionalized PEG   | H <sub>2</sub> N-PEG-COOH            | 3,400            | ++       | -               |                                    |
|                             | H <sub>2</sub> N-PEG-COOH            | 5,000            | ++       | +               |                                    |
|                             | HO-PEG-NH <sub>2</sub>               | 5,000            | ++       | -               |                                    |
|                             | HOOC-PEG-SH                          | 5,000            | +        | -               |                                    |
|                             | mPEG-biotin                          | 5,000            | -        | -               |                                    |
|                             | Biotin-PEG-NH <sub>2</sub>           | 5,000            | -        | -               |                                    |
|                             | Fluorescein-PEG-NH <sub>2</sub>      | 5,000            | ++       | +               |                                    |

<sup>a</sup>4-arm amine-functionalized PEG, <sup>b</sup>6-arm amine-functionalized PEG, <sup>c</sup>4-arm thiol-functionalized PEG, <sup>d</sup>4-arm carboxyl-functionalized PEG, <sup>e</sup>methoxy-functionalized PEG.

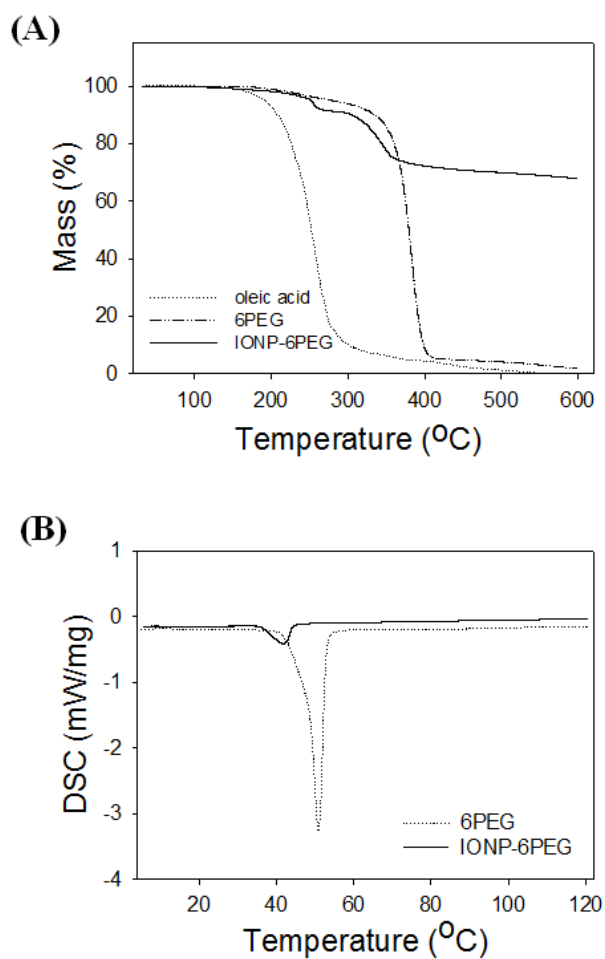

**Figure S1.** Characterization of IONP-6PEG: (A) TGA of aqueous-dispersed IONPs (IONP-6PEG) with oleic acid and 6(PEG-NH<sub>2</sub>) (6PEG) as control. (B) DSC of aqueous-dispersed IONPs (IONP-6PEG) with 6(PEG-NH<sub>2</sub>) (6PEG) as control.

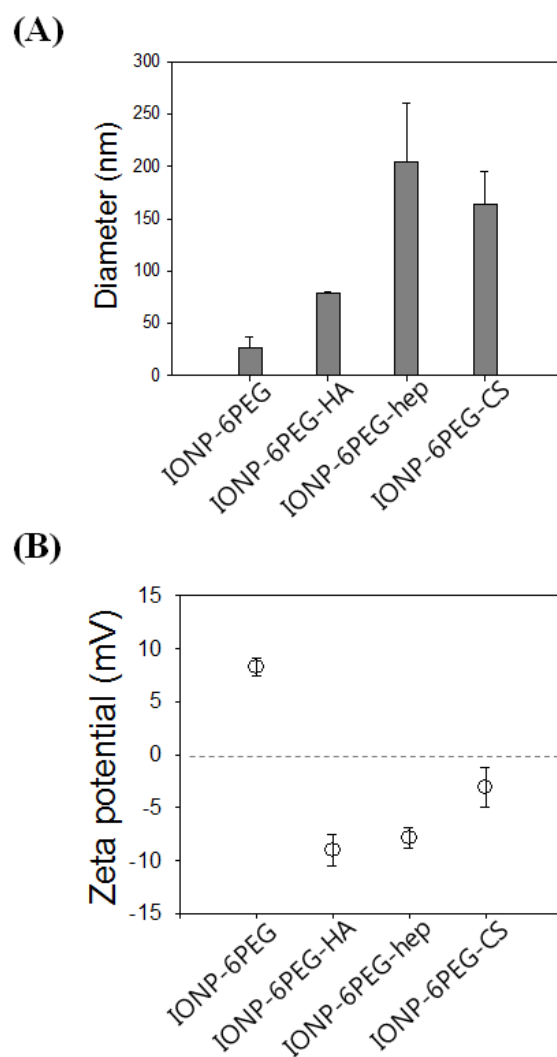

**Figure S2.** DLS (A) and zeta potential (B) measurements of IONP-6PEGs before (IONP-6PEG) or after biofunctionalization with HA (IONP-6PEG-HA), heparin (IONP-6PEG-hep), and chondroitin sulfate (IONP-6PEG-CS).

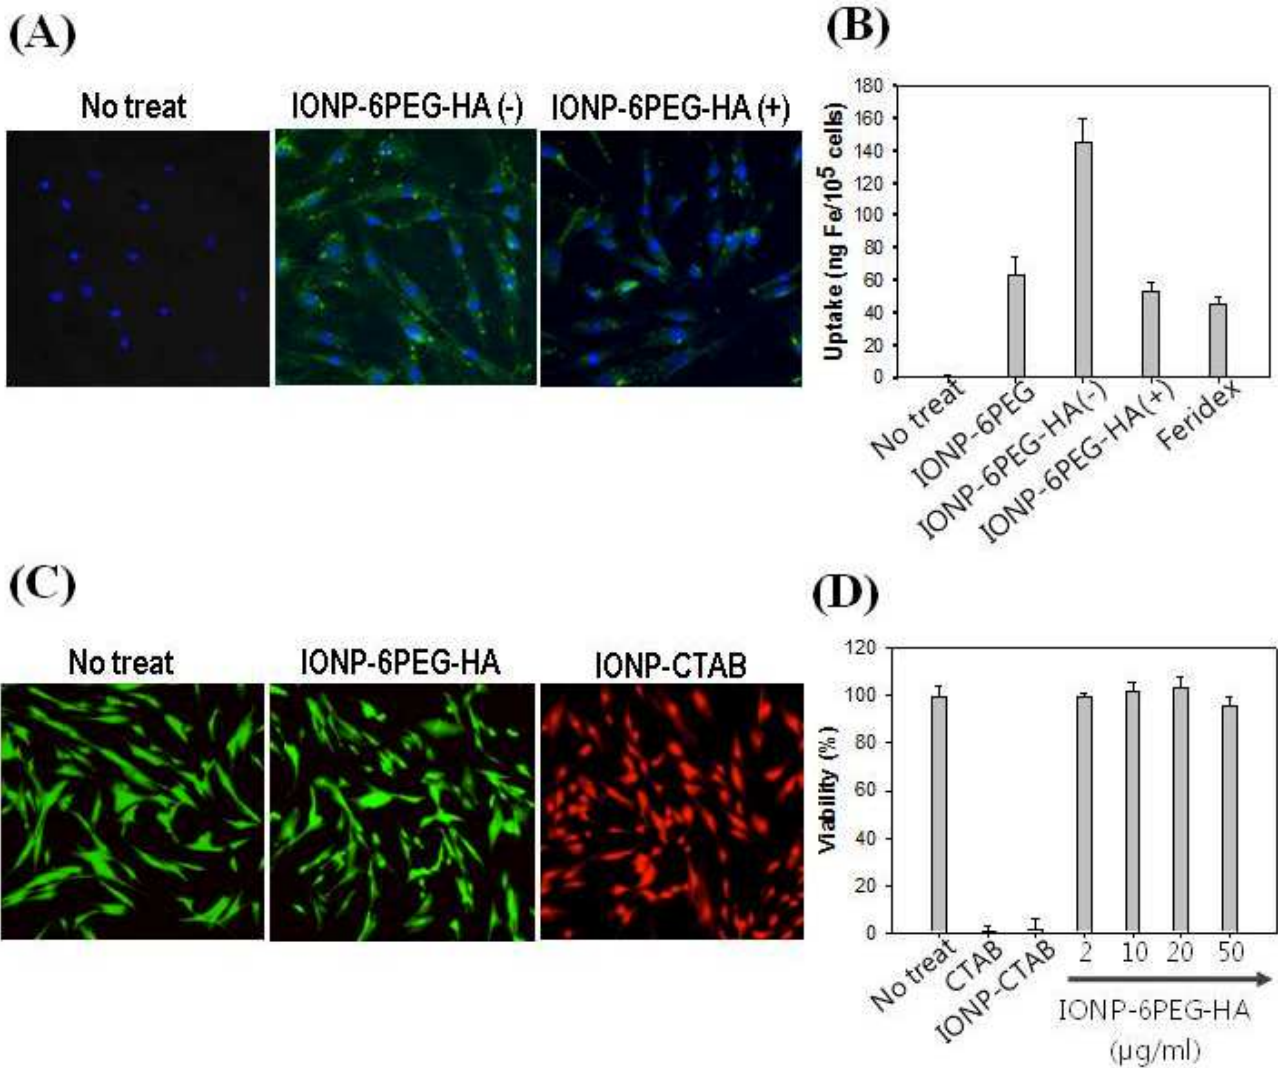

**Figure S3.** Labeling of MSCs using IONP-6PEG-HA. (A) Confocal microscopy of MSCs treated with fluorescein-labeled IONP-6PEG-HA (green) with nuclei stained with DAPI (blue). (B) Quantitative uptake of IONP-6PEG-HA measured by ICP-AES. (C) Live (green) and dead (red) cells treated with IONP-6PEG-HA. Values for MSCs without any treatment (no treat) or treated with CTAB (CTAB) and CTAB coated IONPs (IONP-CTAB) are shown as control. Cells treated with IONP-6PEG-HA in the presence of excess HA is shown with a (+), otherwise (-).

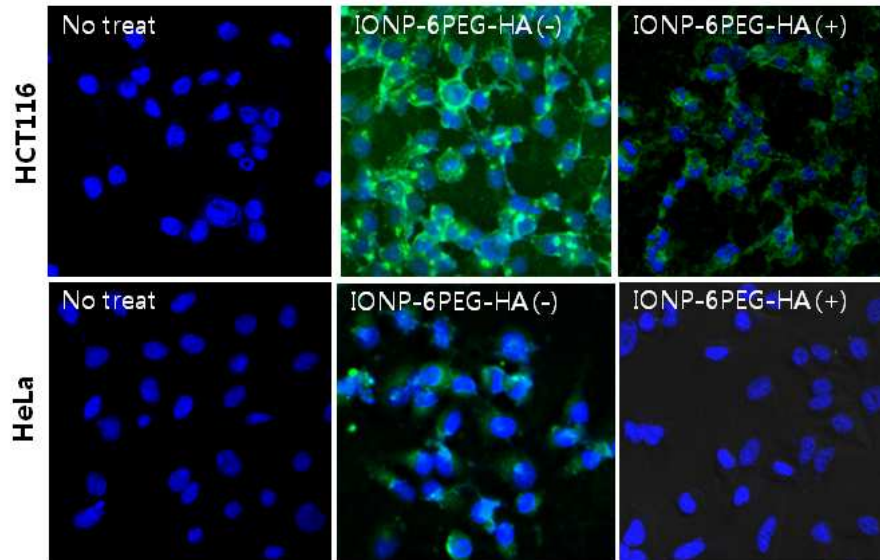

**Figure S4.** Confocal microscopy of CD44 over-expressing HCT116 cells (upper row) and normally expressing HeLa cells (bottom row) treated with fluorescein-labeled IONP-6PEG-HA (green) in absence (-) or presence (+) of excess HA, or without any treatment (No treat). Nuclei were stained with DAPI (blue).
